# Supplementary material for: Correction: Enantioselective, convergent synthesis of the ineleganolide core by a tandem annulation cascade
Source: PubMed Central journal article supplement (PMC6349058; doi:10.1039/c8sc90236d), 2019-01-14
Supplement: SC-010-C8SC90236D-s001.pdf [file SC-010-C8SC90236D-s001.pdf]

**Correction: Enantioselective, Convergent Synthesis of the Ineleganolide Core by a Tandem Annulation Cascade**

Robert A. Craig, II, Jennifer L. Roizen, Russell C. Smith,  
Amanda C. Jones, Scott C. Virgil, and Brian M. Stoltz\*

*Warren and Katharine Schlinger Laboratory for Chemistry and Chemical Engineering,  
Division of Chemistry and Chemical Engineering, California Institute of Technology, MC  
101-20, Pasadena, CA 91125, U.S.A.*

**Table of Contents**

|                                                             |     |
|-------------------------------------------------------------|-----|
| 1. X-Ray Crystal Structure Analysis of Enone <i>ent-12A</i> | S2  |
| 2. Notes & References                                       | S15 |

**1. X-Ray Crystal Structure Analysis of Enone *ent*-12A**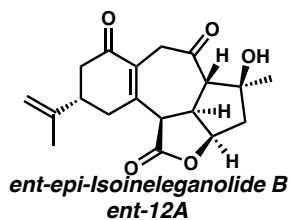Contents

|            |                                     |
|------------|-------------------------------------|
| Table 1.1. | Experimental Details                |
| Table 1.2. | Crystal Data                        |
| Table 1.3. | Atomic Coordinates                  |
| Table 1.4. | Full Bond Distances and Angles      |
| Table 1.5. | Anisotropic Displacement Parameters |
| Table 1.6. | Hydrogen Atomic Coordinates         |
| Table 1.7. | Torsion Angles                      |

Figure 1.1. X-Ray Crystal Structure of Enone *ent*-12A

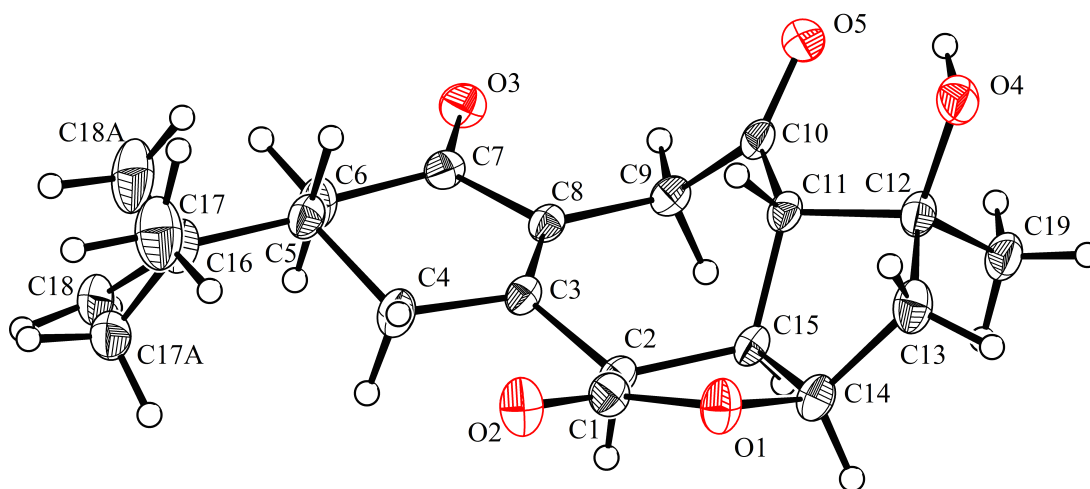

Table 1.1. Experimental Details for X-Ray Structure Determination of Enone **ent-12A**.

Low-temperature diffraction data ( $\phi$ - and  $\omega$ -scans) were collected on a Bruker AXS D8 VENTURE KAPPA diffractometer coupled to a PHOTON 100 CMOS detector with Cu  $K\alpha$  radiation ( $\lambda = 1.54178 \text{ \AA}$ ) from an  $I\mu\text{S}$  micro-source for the structure of *ent-epi*-Isoineleganolide B (**ent-12A**). The structure was solved by direct methods using SHELXS<sup>1</sup> and refined against  $F^2$  on all data by full-matrix least squares with SHELXL-2014<sup>2</sup> using established refinement techniques.<sup>3</sup> All non-hydrogen atoms were refined anisotropically. All hydrogen atoms were included into the model at geometrically calculated positions and refined using a riding model. The isotropic displacement parameters of all hydrogen atoms were fixed to 1.2 times the  $U$  value of the atoms they are linked to (1.5 times for methyl groups).

*ent-epi*-Isoineleganolide B (**ent-12A**) crystallizes in the monoclinic space group  $C2$  with one molecule in the asymmetric unit. The isopropenyl group was disordered in the crystal (51.5:48.5) and the corresponding positions were labeled C17-C18 and C17A-C18A, respectively.

Table 1.2. Crystal Data and Structure Refinement for Enone **ent-12A**.

|                                   |                                                                                                   |
|-----------------------------------|---------------------------------------------------------------------------------------------------|
| Identification code               | p17139                                                                                            |
| Empirical formula                 | C <sub>19</sub> H <sub>22</sub> O <sub>5</sub>                                                    |
| Formula weight                    | 330.36                                                                                            |
| Temperature                       | 100 K                                                                                             |
| Wavelength                        | 1.54178 Å                                                                                         |
| Crystal system                    | Monoclinic                                                                                        |
| Space group                       | C 1 2 1                                                                                           |
| Unit cell dimensions              | a = 22.5468(19) Å    α = 90°<br>b = 10.4722(9) Å    β = 107.751(5)°<br>c = 7.3277(5) Å    γ = 90° |
| Volume                            | 1647.8(2) Å <sup>3</sup>                                                                          |
| Z                                 | 4                                                                                                 |
| Density (calculated)              | 1.332 Mg/m <sup>3</sup>                                                                           |
| Absorption coefficient            | 0.787 mm <sup>-1</sup>                                                                            |
| F(000)                            | 704                                                                                               |
| Crystal size                      | 0.32 x 0.13 x 0.06 mm <sup>3</sup>                                                                |
| Theta range for data collection   | 4.698 to 79.209°.                                                                                 |
| Index ranges                      | -28 ≤ h ≤ 28, -12 ≤ k ≤ 13, -9 ≤ l ≤ 9                                                            |
| Reflections collected             | 19495                                                                                             |
| Independent reflections           | 3531 [R(int) = 0.0367]                                                                            |
| Completeness to theta =           | 67.000° 99.9 %                                                                                    |
| Absorption correction             | Semi-empirical from equivalents                                                                   |
| Max. and min. transmission        | 1.0000 and 0.8733                                                                                 |
| Refinement method                 | Full-matrix least-squares on F <sup>2</sup>                                                       |
| Data / restraints / parameters    | 3531 / 1 / 240                                                                                    |
| Goodness-of-fit on F <sup>2</sup> | 1.048                                                                                             |
| Final R indices                   | [I > 2σ(I)] R <sub>1</sub> = 0.0274, wR <sub>2</sub> = 0.0697                                     |
| R indices (all data)              | R <sub>1</sub> = 0.0277, wR <sub>2</sub> = 0.0699                                                 |
| Absolute structure parameter      | 0.06(4)                                                                                           |
| Extinction coefficient            | n/a                                                                                               |
| Largest diff. peak and hole       | 0.212 and -0.159 e.Å <sup>-3</sup>                                                                |

Table 1.3. Atomic coordinates ( $\times 10^4$ ) and equivalent isotropic displacement parameters ( $\text{\AA}^2 \times 10^3$ ) for Enone **ent-12A**.  $U(\text{eq})$  is defined as one third of the trace of the orthogonalized  $U^{ij}$  tensor.

|        | x         | y          | z          | U(eq)   |
|--------|-----------|------------|------------|---------|
| O(1)   | 23712(6)  | 35782(12)  | 113320(18) | 263(3)  |
| O(2)   | 33298(6)  | 33911(13)  | 111652(18) | 289(3)  |
| O(3)   | 26431(6)  | 67848(12)  | 31508(17)  | 249(3)  |
| O(4)   | 5991(6)   | 32240(13)  | 65740(20)  | 301(3)  |
| O(5)   | 10499(6)  | 49135(14)  | 39801(17)  | 295(3)  |
| C(1)   | 28415(8)  | 39480(16)  | 106680(20) | 215(3)  |
| C(2)   | 26543(7)  | 51484(15)  | 94210(20)  | 180(3)  |
| C(3)   | 29080(7)  | 53076(14)  | 77310(20)  | 173(3)  |
| C(4)   | 35799(8)  | 49235(18)  | 81350(20)  | 236(3)  |
| C(5)   | 37965(7)  | 48220(16)  | 63610(20)  | 211(3)  |
| C(6)   | 36087(8)  | 60431(18)  | 52050(30)  | 256(4)  |
| C(7)   | 29179(8)  | 62554(15)  | 46600(20)  | 192(3)  |
| C(8)   | 25865(7)  | 58747(15)  | 60600(20)  | 173(3)  |
| C(9)   | 19067(8)  | 62977(16)  | 54540(20)  | 192(3)  |
| C(10)  | 14604(7)  | 52167(16)  | 54220(20)  | 197(3)  |
| C(11)  | 15547(7)  | 45161(15)  | 72810(20)  | 184(3)  |
| C(12)  | 9576(8)   | 41864(16)  | 77910(30)  | 220(3)  |
| C(13)  | 12370(8)  | 36506(18)  | 98240(30)  | 268(4)  |
| C(14)  | 18327(8)  | 44223(17)  | 106900(20) | 223(3)  |
| C(15)  | 19512(7)  | 52125(15)  | 90640(20)  | 178(3)  |
| C(16)  | 44859(8)  | 45242(19)  | 69090(30)  | 277(4)  |
| C(17)  | 46690(20) | 32160(50)  | 76470(160) | 440(20) |
| C(17A) | 49280(60) | 55260(140) | 76100(140) | 327(18) |
| C(18)  | 49260(50) | 54390(110) | 70230(140) | 278(16) |
| C(18A) | 46540(20) | 33160(50)  | 65170(170) | 430(20) |
| C(19)  | 5505(8)   | 53574(18)  | 77820(30)  | 262(4)  |

Table 1.4. Bond lengths [ $\text{\AA}$ ] and angles [ $^\circ$ ] for Enone **ent-12A**.

---

|             |            |
|-------------|------------|
| O(1)-C(1)   | 1.351(2)   |
| O(1)-C(14)  | 1.459(2)   |
| O(2)-C(1)   | 1.200(2)   |
| O(3)-C(7)   | 1.223(2)   |
| O(4)-H(4)   | 0.8400     |
| O(4)-C(12)  | 1.423(2)   |
| O(5)-C(10)  | 1.215(2)   |
| C(1)-C(2)   | 1.535(2)   |
| C(2)-H(2)   | 1.0000     |
| C(2)-C(3)   | 1.5237(19) |
| C(2)-C(15)  | 1.527(2)   |
| C(3)-C(4)   | 1.507(2)   |
| C(3)-C(8)   | 1.355(2)   |
| C(4)-H(4A)  | 0.9900     |
| C(4)-H(4B)  | 0.9900     |
| C(4)-C(5)   | 1.525(2)   |
| C(5)-H(5)   | 1.0000     |
| C(5)-C(6)   | 1.521(2)   |
| C(5)-C(16)  | 1.515(2)   |
| C(6)-H(6A)  | 0.9900     |
| C(6)-H(6B)  | 0.9900     |
| C(6)-C(7)   | 1.502(2)   |
| C(7)-C(8)   | 1.496(2)   |
| C(8)-C(9)   | 1.526(2)   |
| C(9)-H(9A)  | 0.9900     |
| C(9)-H(9B)  | 0.9900     |
| C(9)-C(10)  | 1.510(2)   |
| C(10)-C(11) | 1.504(2)   |
| C(11)-H(11) | 1.0000     |
| C(11)-C(12) | 1.542(2)   |
| C(11)-C(15) | 1.525(2)   |
| C(12)-C(13) | 1.536(2)   |
| C(12)-C(19) | 1.531(2)   |

Table 1.4. (cont'd)

|                 |            |
|-----------------|------------|
| C(13)-H(13A)    | 0.9900     |
| C(13)-H(13B)    | 0.9900     |
| C(13)-C(14)     | 1.530(2)   |
| C(14)-H(14)     | 1.0000     |
| C(14)-C(15)     | 1.540(2)   |
| C(15)-H(15)     | 1.0000     |
| C(16)-C(17)     | 1.485(6)   |
| C(16)-C(17A)    | 1.430(13)  |
| C(16)-C(18)     | 1.363(11)  |
| C(16)-C(18A)    | 1.376(5)   |
| C(17)-H(17A)    | 0.9800     |
| C(17)-H(17B)    | 0.9800     |
| C(17)-H(17C)    | 0.9800     |
| C(17A)-H(17D)   | 0.9800     |
| C(17A)-H(17E)   | 0.9800     |
| C(17A)-H(17F)   | 0.9800     |
| C(18)-H(18A)    | 0.9500     |
| C(18)-H(18B)    | 0.9500     |
| C(18A)-H(18C)   | 0.9500     |
| C(18A)-H(18D)   | 0.9500     |
| C(19)-H(19A)    | 0.9800     |
| C(19)-H(19B)    | 0.9800     |
| C(19)-H(19C)    | 0.9800     |
|                 |            |
| C(1)-O(1)-C(14) | 112.18(12) |
| C(12)-O(4)-H(4) | 109.5      |
| O(1)-C(1)-C(2)  | 110.20(14) |
| O(2)-C(1)-O(1)  | 119.94(15) |
| O(2)-C(1)-C(2)  | 129.72(15) |
| C(1)-C(2)-H(2)  | 105.3      |
| C(3)-C(2)-C(1)  | 118.02(13) |
| C(3)-C(2)-H(2)  | 105.3      |
| C(3)-C(2)-C(15) | 118.89(12) |
| C(15)-C(2)-C(1) | 102.75(12) |

Table 1.4. (cont'd)

|                  |            |
|------------------|------------|
| C(15)-C(2)-H(2)  | 105.3      |
| C(4)-C(3)-C(2)   | 114.52(13) |
| C(8)-C(3)-C(2)   | 123.54(13) |
| C(8)-C(3)-C(4)   | 121.56(13) |
| C(3)-C(4)-H(4A)  | 108.6      |
| C(3)-C(4)-H(4B)  | 108.6      |
| C(3)-C(4)-C(5)   | 114.51(13) |
| H(4A)-C(4)-H(4B) | 107.6      |
| C(5)-C(4)-H(4A)  | 108.6      |
| C(5)-C(4)-H(4B)  | 108.6      |
| C(4)-C(5)-H(5)   | 107.8      |
| C(6)-C(5)-C(4)   | 107.99(13) |
| C(6)-C(5)-H(5)   | 107.8      |
| C(16)-C(5)-C(4)  | 110.96(14) |
| C(16)-C(5)-H(5)  | 107.8      |
| C(16)-C(5)-C(6)  | 114.19(14) |
| C(5)-C(6)-H(6A)  | 109.4      |
| C(5)-C(6)-H(6B)  | 109.4      |
| H(6A)-C(6)-H(6B) | 108.0      |
| C(7)-C(6)-C(5)   | 111.28(13) |
| C(7)-C(6)-H(6A)  | 109.4      |
| C(7)-C(6)-H(6B)  | 109.4      |
| O(3)-C(7)-C(6)   | 120.40(14) |
| O(3)-C(7)-C(8)   | 121.31(14) |
| C(8)-C(7)-C(6)   | 118.19(13) |
| C(3)-C(8)-C(7)   | 119.68(14) |
| C(3)-C(8)-C(9)   | 127.11(13) |
| C(7)-C(8)-C(9)   | 112.99(13) |
| C(8)-C(9)-H(9A)  | 109.0      |
| C(8)-C(9)-H(9B)  | 109.0      |
| H(9A)-C(9)-H(9B) | 107.8      |
| C(10)-C(9)-C(8)  | 113.11(13) |
| C(10)-C(9)-H(9A) | 109.0      |
| C(10)-C(9)-H(9B) | 109.0      |



Table 1.4. (cont'd)

|                     |            |
|---------------------|------------|
| O(5)-C(10)-C(9)     | 122.45(15) |
| O(5)-C(10)-C(11)    | 121.31(15) |
| C(11)-C(10)-C(9)    | 116.24(13) |
| C(10)-C(11)-H(11)   | 107.4      |
| C(10)-C(11)-C(12)   | 115.84(13) |
| C(10)-C(11)-C(15)   | 115.26(13) |
| C(12)-C(11)-H(11)   | 107.4      |
| C(15)-C(11)-H(11)   | 107.4      |
| C(15)-C(11)-C(12)   | 103.09(12) |
| O(4)-C(12)-C(11)    | 112.21(13) |
| O(4)-C(12)-C(13)    | 109.61(14) |
| O(4)-C(12)-C(19)    | 109.84(14) |
| C(13)-C(12)-C(11)   | 100.76(13) |
| C(19)-C(12)-C(11)   | 112.72(14) |
| C(19)-C(12)-C(13)   | 111.40(14) |
| C(12)-C(13)-H(13A)  | 110.8      |
| C(12)-C(13)-H(13B)  | 110.8      |
| H(13A)-C(13)-H(13B) | 108.8      |
| C(14)-C(13)-C(12)   | 104.96(13) |
| C(14)-C(13)-H(13A)  | 110.8      |
| C(14)-C(13)-H(13B)  | 110.8      |
| O(1)-C(14)-C(13)    | 110.66(14) |
| O(1)-C(14)-H(14)    | 111.3      |
| O(1)-C(14)-C(15)    | 104.56(12) |
| C(13)-C(14)-H(14)   | 111.3      |
| C(13)-C(14)-C(15)   | 107.48(14) |
| C(15)-C(14)-H(14)   | 111.3      |
| C(2)-C(15)-C(14)    | 105.05(12) |
| C(2)-C(15)-H(15)    | 111.1      |
| C(11)-C(15)-C(2)    | 115.63(12) |
| C(11)-C(15)-C(14)   | 102.20(13) |
| C(11)-C(15)-H(15)   | 111.1      |
| C(14)-C(15)-H(15)   | 111.1      |
| C(17)-C(16)-C(5)    | 115.8(3)   |

Table 1.4. (cont'd)

|                      |          |
|----------------------|----------|
| C(17A)-C(16)-C(5)    | 119.3(6) |
| C(18)-C(16)-C(5)     | 122.7(5) |
| C(18)-C(16)-C(17)    | 120.6(6) |
| C(18A)-C(16)-C(5)    | 117.4(3) |
| C(18A)-C(16)-C(17A)  | 122.9(6) |
| C(16)-C(17)-H(17A)   | 109.5    |
| C(16)-C(17)-H(17B)   | 109.5    |
| C(16)-C(17)-H(17C)   | 109.5    |
| H(17A)-C(17)-H(17B)  | 109.5    |
| H(17A)-C(17)-H(17C)  | 109.5    |
| H(17B)-C(17)-H(17C)  | 109.5    |
| C(16)-C(17A)-H(17D)  | 109.5    |
| C(16)-C(17A)-H(17E)  | 109.5    |
| C(16)-C(17A)-H(17F)  | 109.5    |
| H(17D)-C(17A)-H(17E) | 109.5    |
| H(17D)-C(17A)-H(17F) | 109.5    |
| H(17E)-C(17A)-H(17F) | 109.5    |
| C(16)-C(18)-H(18A)   | 120.0    |
| C(16)-C(18)-H(18B)   | 120.0    |
| H(18A)-C(18)-H(18B)  | 120.0    |
| C(16)-C(18A)-H(18C)  | 120.0    |
| C(16)-C(18A)-H(18D)  | 120.0    |
| H(18C)-C(18A)-H(18D) | 120.0    |
| C(12)-C(19)-H(19A)   | 109.5    |
| C(12)-C(19)-H(19B)   | 109.5    |
| C(12)-C(19)-H(19C)   | 109.5    |
| H(19A)-C(19)-H(19B)  | 109.5    |
| H(19A)-C(19)-H(19C)  | 109.5    |
| H(19B)-C(19)-H(19C)  | 109.5    |

---

Symmetry transformations used to generate equivalent atoms:

Table 1.5. Anisotropic displacement parameters ( $\text{\AA}^2 \times 10^3$ ) for Enone **ent-12A**. The anisotropic displacement factor exponent takes the form:  $-2\pi^2 [h^2 a^{*2} U^{11} + \dots + 2hka^* b^* U^{12}]$ .

|        | U11     | U22     | U33     | U23     | U13     |
|--------|---------|---------|---------|---------|---------|
| O(1)   | 255(6)  | 280(7)  | 290(6)  | 121(5)  | 137(5)  |
| O(2)   | 255(6)  | 286(7)  | 341(7)  | 137(6)  | 113(5)  |
| O(3)   | 293(6)  | 270(6)  | 195(5)  | 43(5)   | 87(5)   |
| O(4)   | 262(6)  | 256(6)  | 421(7)  | -99(6)  | 157(6)  |
| O(5)   | 239(6)  | 416(8)  | 237(6)  | -53(5)  | 83(5)   |
| C(1)   | 231(8)  | 226(8)  | 203(7)  | 41(6)   | 89(6)   |
| C(2)   | 209(7)  | 175(7)  | 175(7)  | 14(6)   | 88(6)   |
| C(3)   | 209(7)  | 134(7)  | 207(7)  | -3(6)   | 111(6)  |
| C(4)   | 223(7)  | 282(9)  | 233(8)  | 59(6)   | 111(6)  |
| C(5)   | 219(7)  | 198(7)  | 255(8)  | -1(6)   | 129(6)  |
| C(6)   | 239(8)  | 294(9)  | 281(8)  | 67(7)   | 146(7)  |
| C(7)   | 236(8)  | 165(7)  | 194(7)  | -1(6)   | 94(6)   |
| C(8)   | 201(7)  | 144(7)  | 199(7)  | -15(5)  | 97(6)   |
| C(9)   | 228(8)  | 179(7)  | 184(7)  | 18(6)   | 84(6)   |
| C(10)  | 188(7)  | 210(8)  | 222(7)  | -33(6)  | 106(6)  |
| C(11)  | 190(7)  | 153(7)  | 238(8)  | -22(6)  | 106(6)  |
| C(12)  | 210(8)  | 179(7)  | 314(8)  | -38(6)  | 143(6)  |
| C(13)  | 257(8)  | 243(8)  | 357(9)  | 44(7)   | 171(7)  |
| C(14)  | 241(8)  | 226(8)  | 239(8)  | 35(6)   | 128(6)  |
| C(15)  | 210(7)  | 162(7)  | 199(7)  | 8(6)    | 116(6)  |
| C(16)  | 241(9)  | 297(9)  | 339(9)  | 39(7)   | 160(7)  |
| C(17)  | 320(20) | 340(20) | 700(50) | 90(30)  | 210(20) |
| C(17A) | 230(20) | 500(40) | 270(40) | -10(40) | 100(30) |
| C(18)  | 220(20) | 350(30) | 320(40) | 0(40)   | 140(30) |
| C(18A) | 320(20) | 280(20) | 760(60) | 40(30)  | 290(30) |
| C(19)  | 226(8)  | 272(9)  | 326(9)  | -36(7)  | 140(7)  |

Table 1.6. Hydrogen coordinates ( $\times 10^4$ ) and isotropic displacement parameters ( $\text{\AA}^2 \times 10^3$ ) for Enone **ent-12A**.

|        | x    | y    | z     | U(eq) |
|--------|------|------|-------|-------|
| H(4)   | 518  | 3454 | 5426  | 45    |
| H(2)   | 2830 | 5881 | 10295 | 22    |
| H(4A)  | 3644 | 4087 | 8797  | 28    |
| H(4B)  | 3845 | 5556 | 9021  | 28    |
| H(5)   | 3567 | 4098 | 5565  | 25    |
| H(6A)  | 3827 | 6778 | 5971  | 31    |
| H(6B)  | 3737 | 5991 | 4031  | 31    |
| H(9A)  | 1854 | 6964 | 6349  | 23    |
| H(9B)  | 1801 | 6682 | 4160  | 23    |
| H(11)  | 1769 | 3694 | 7192  | 22    |
| H(13A) | 945  | 3764 | 10582 | 32    |
| H(13B) | 1333 | 2731 | 9782  | 32    |
| H(14)  | 1796 | 4983 | 11755 | 27    |
| H(15)  | 1809 | 6115 | 9090  | 21    |
| H(17A) | 4567 | 3092 | 8843  | 66    |
| H(17B) | 5118 | 3104 | 7889  | 66    |
| H(17C) | 4443 | 2588 | 6697  | 66    |
| H(17D) | 4841 | 6230 | 6684  | 49    |
| H(17E) | 5349 | 5201 | 7788  | 49    |
| H(17F) | 4895 | 5835 | 8839  | 49    |
| H(18A) | 5355 | 5242 | 7579  | 33    |
| H(18B) | 4804 | 6273 | 6546  | 33    |
| H(18C) | 5080 | 3118 | 6711  | 51    |
| H(18D) | 4344 | 2680 | 6053  | 51    |
| H(19A) | 432  | 5755 | 6511  | 39    |
| H(19B) | 784  | 5972 | 8741  | 39    |
| H(19C) | 175  | 5095 | 8088  | 39    |

Table 1.7. Torsion angles [ $^{\circ}$ ] for Enone **ent-12A**.

---

|                        |             |
|------------------------|-------------|
| O(1)-C(1)-C(2)-C(3)    | -146.69(14) |
| O(1)-C(1)-C(2)-C(15)   | -13.73(17)  |
| O(1)-C(14)-C(15)-C(2)  | -22.20(16)  |
| O(1)-C(14)-C(15)-C(11) | 98.89(14)   |
| O(2)-C(1)-C(2)-C(3)    | 37.7(3)     |
| O(2)-C(1)-C(2)-C(15)   | 170.70(18)  |
| O(3)-C(7)-C(8)-C(3)    | -178.99(15) |
| O(3)-C(7)-C(8)-C(9)    | -3.9(2)     |
| O(4)-C(12)-C(13)-C(14) | 152.44(13)  |
| O(5)-C(10)-C(11)-C(12) | -42.8(2)    |
| O(5)-C(10)-C(11)-C(15) | -163.26(15) |
| C(1)-O(1)-C(14)-C(13)  | 129.81(15)  |
| C(1)-O(1)-C(14)-C(15)  | 14.37(19)   |
| C(1)-C(2)-C(3)-C(4)    | -40.78(19)  |
| C(1)-C(2)-C(3)-C(8)    | 146.15(15)  |
| C(1)-C(2)-C(15)-C(11)  | -90.37(15)  |
| C(1)-C(2)-C(15)-C(14)  | 21.45(15)   |
| C(2)-C(3)-C(4)-C(5)    | 168.14(13)  |
| C(2)-C(3)-C(8)-C(7)    | 166.15(14)  |
| C(2)-C(3)-C(8)-C(9)    | -8.1(2)     |
| C(3)-C(2)-C(15)-C(11)  | 42.1(2)     |
| C(3)-C(2)-C(15)-C(14)  | 153.91(14)  |
| C(3)-C(4)-C(5)-C(6)    | 50.14(18)   |
| C(3)-C(4)-C(5)-C(16)   | 176.00(15)  |
| C(3)-C(8)-C(9)-C(10)   | -58.7(2)    |
| C(4)-C(3)-C(8)-C(7)    | -6.4(2)     |
| C(4)-C(3)-C(8)-C(9)    | 179.26(15)  |
| C(4)-C(5)-C(6)-C(7)    | -57.90(18)  |
| C(4)-C(5)-C(16)-C(17)  | 70.8(5)     |
| C(4)-C(5)-C(16)-C(17A) | -78.4(5)    |
| C(4)-C(5)-C(16)-C(18)  | -98.9(5)    |
| C(4)-C(5)-C(16)-C(18A) | 108.1(6)    |
| C(5)-C(6)-C(7)-O(3)    | -147.67(16) |
| C(5)-C(6)-C(7)-C(8)    | 35.9(2)     |

Table 1.7. (cont'd)

|                         |             |
|-------------------------|-------------|
| C(6)-C(5)-C(16)-C(17)   | -166.9(5)   |
| C(6)-C(5)-C(16)-C(17A)  | 43.9(5)     |
| C(6)-C(5)-C(16)-C(18)   | 23.4(5)     |
| C(6)-C(5)-C(16)-C(18A)  | -129.6(6)   |
| C(6)-C(7)-C(8)-C(3)     | -2.6(2)     |
| C(6)-C(7)-C(8)-C(9)     | 172.42(15)  |
| C(7)-C(8)-C(9)-C(10)    | 126.68(14)  |
| C(8)-C(3)-C(4)-C(5)     | -18.6(2)    |
| C(8)-C(9)-C(10)-O(5)    | -120.83(16) |
| C(8)-C(9)-C(10)-C(11)   | 58.53(17)   |
| C(9)-C(10)-C(11)-C(12)  | 137.82(14)  |
| C(9)-C(10)-C(11)-C(15)  | 17.37(19)   |
| C(10)-C(11)-C(12)-O(4)  | 70.14(18)   |
| C(10)-C(11)-C(12)-C(13) | -173.34(14) |
| C(10)-C(11)-C(12)-C(19) | -54.51(19)  |
| C(10)-C(11)-C(15)-C(2)  | -79.03(17)  |
| C(10)-C(11)-C(15)-C(14) | 167.49(13)  |
| C(11)-C(12)-C(13)-C(14) | 34.01(16)   |
| C(12)-C(11)-C(15)-C(2)  | 153.77(13)  |
| C(12)-C(11)-C(15)-C(14) | 40.29(15)   |
| C(12)-C(13)-C(14)-O(1)  | -123.42(14) |
| C(12)-C(13)-C(14)-C(15) | -9.82(17)   |
| C(13)-C(14)-C(15)-C(2)  | -139.84(14) |
| C(13)-C(14)-C(15)-C(11) | -18.75(16)  |
| C(14)-O(1)-C(1)-O(2)    | 175.66(16)  |
| C(14)-O(1)-C(1)-C(2)    | -0.42(19)   |
| C(15)-C(2)-C(3)-C(4)    | -166.18(14) |
| C(15)-C(2)-C(3)-C(8)    | 20.7(2)     |
| C(15)-C(11)-C(12)-O(4)  | -163.04(14) |
| C(15)-C(11)-C(12)-C(13) | -46.51(15)  |
| C(15)-C(11)-C(12)-C(19) | 72.32(17)   |
| C(16)-C(5)-C(6)-C(7)    | 178.17(15)  |
| C(19)-C(12)-C(13)-C(14) | -85.78(16)  |

---

**2. Notes & References**

1. Sheldrick, G. M. *Acta Cryst.* **1990**, A46, 467–473.
2. Sheldrick, G. M. *Acta Cryst.* **2008**, A64, 112–122.
3. Müller, P. *Crystallography Reviews* **2009**, 15, 57–83.
